# Supplementary material
Source: PubMed Central journal article supplement (PMC3055161)
Supplement: 97320630005402S1.pdf [file 97320630005402S1.pdf]

### Supplementary material:

**Table 1:** Distribution of EST-SSRs in different chromosomes identified from EST database of *Fusarium graminearum*

| Chromosome   | Mono- | Di- | Tri- | Tetra- | Penta- | Hexa- | Total |
|--------------|-------|-----|------|--------|--------|-------|-------|
| Chromosome 1 | 366   | 133 | 87   | 18     | 6      | 1     | 611   |
| Chromosome 2 | 239   | 68  | 49   | 3      | 4      | 5     | 368   |
| Chromosome 3 | 201   | 56  | 50   | 4      | 3      | 5     | 319   |
| Chromosome 4 | 248   | 79  | 50   | 9      | 8      | 3     | 397   |
| Unmapped     | 9     | 1   | 0    | 0      | 0      | 0     | 10    |
| Total        | 1063  | 337 | 236  | 34     | 21     | 14    | 1705  |

**Table 2:** Frequency of mononucleotide repeats in different chromosomes of *Fusarium graminearum* genome

| Chromosome   | A   | T   | G  | C  | Total |
|--------------|-----|-----|----|----|-------|
| Chromosome 1 | 163 | 155 | 27 | 21 | 366   |
| Chromosome 2 | 111 | 102 | 9  | 17 | 239   |
| Chromosome 3 | 95  | 75  | 14 | 17 | 201   |
| Chromosome 4 | 116 | 105 | 13 | 14 | 248   |
| Unmapped     | 7   | 2   | 0  | 0  | 9     |
| Total        | 492 | 439 | 63 | 69 | 1063  |

**Table 3:** Different types of di-, tri-, tetra-, penta- and hexa-nucleotide repeat motifs

| Repeats          | Motifs                                                                                                                                                                                                                                                                  |
|------------------|-------------------------------------------------------------------------------------------------------------------------------------------------------------------------------------------------------------------------------------------------------------------------|
| Di-nucleotide    | AC, AG, AT, CA,CG,CT, GA, GC, GT, TA, TC, TG                                                                                                                                                                                                                            |
| Tri-nucleotide   | AAC, AAG, AAT, ACA, ACC, AGA, AGC, AGG, ATA, ATC, ATG, ATT, CAA, CAC, CAG, CAT, CCA, CCT, CGA, CGT, CGG, CTA, CTC, CTG, CTT, GAA, GAC, GAG, GAT, GCA, GCC, GCT, GGA, GGC, GGT, GTA, GTC, GTG, GTT, TAC, TAG, TAT, TCA, TCC, TCG, TCT, TGA, TGC, TGT, TGG, TTA, TTC, TTG |
| Tetra-nucleotide | AATC, ACTC, AGGT, AGTG, ATAC, ATAG, CAAG, CACT, CAGG, CATA, CATC, CATT, CTAT, CTGG, CTTT, GATG, GGAT, GTGA, TAGA, TAGG, TATC, TAGT, TCAA, TCCA, TCTT, TGAC, TTCC, TTCT, TTGC                                                                                            |
| Penta-nucleotide | ACACG, AGACC, CTTTT, GATGC, GCAAG, GTAAA, GTCTC, TGGAC, TGGTA, TTGCG, AGCAC, AGTCT, ATATC, CTCTG, GCATC, GTATG, GTTTG, TATGC, TCTGG, TGCTC                                                                                                                              |
| Hexa-nucleotide  | AGAGCC, CTTCGA, GATAAG, TCAGGA, TCTGGC, TGAAGA, AAGCCC, ACTTAG, CAAAGC, CCCTAA, GAAGAG, GCAGAG, GTTGCC, TCATCC                                                                                                                                                          |
